# Supplementary material
Source: MDPI journal article supplement (https://www.mdpi.com/2673-9976/20/1/30)
Supplement: s1 [file s1]

# In silico study of **spheroids** fusion through magnetic field gradients

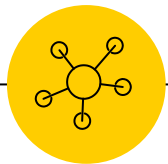

School of Engineering. <sup>(1)</sup>Department of Biomedical Engineering.

Cristian F. Rodriguez<sup>(1)</sup>, Maria Alejandra Castilla-Bolanos<sup>(1)</sup>, Laura Ortiz C. <sup>(1)</sup>, Kevin A. Giraldo R. <sup>(1)</sup>, Carolina Muñoz C. PhD <sup>(1)</sup>, Juan C. Cruz. PhD <sup>(1)</sup>

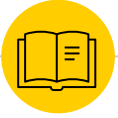

# Cell spheroids

Cell attachment is crucial for cell viability and proliferation

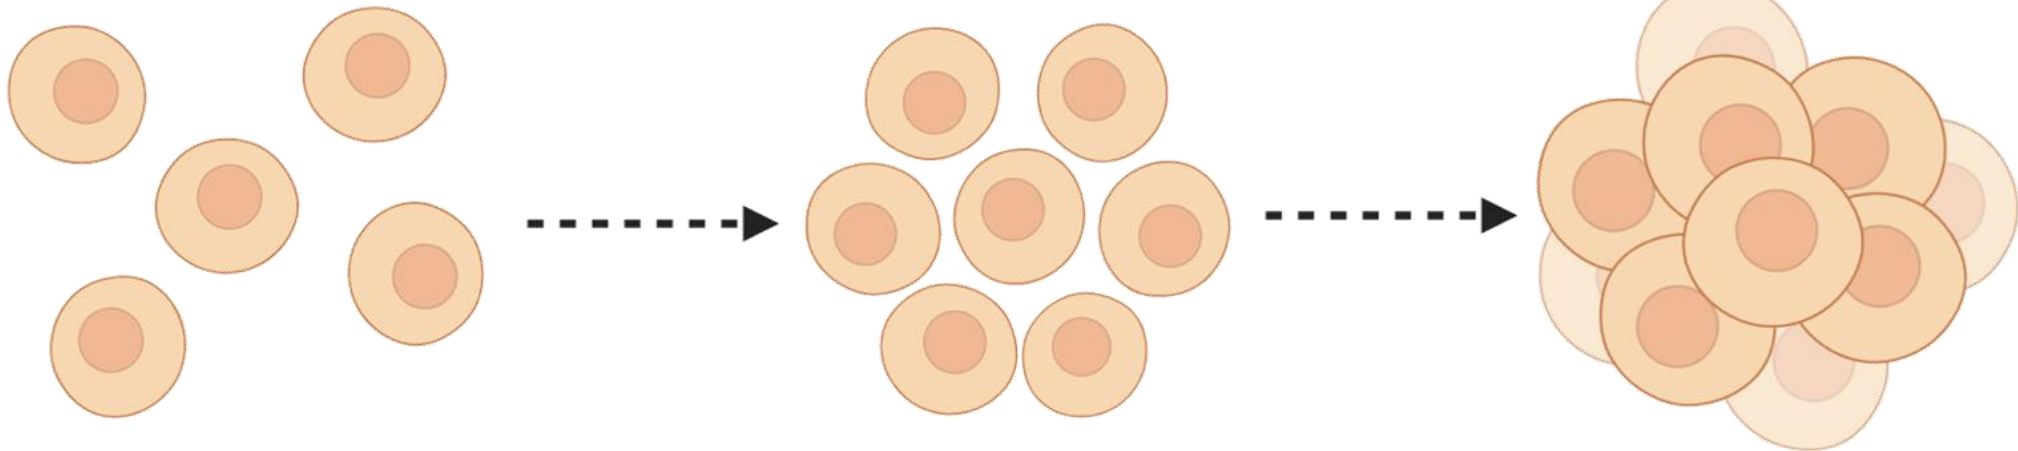

**CELL SCATTERING**

**CELL SPHEROID**

Cell-cell adhesion molecules (CAMs) and proteins, such as integrins and cadherins allow for spheroid formation



# Spheroids fusion

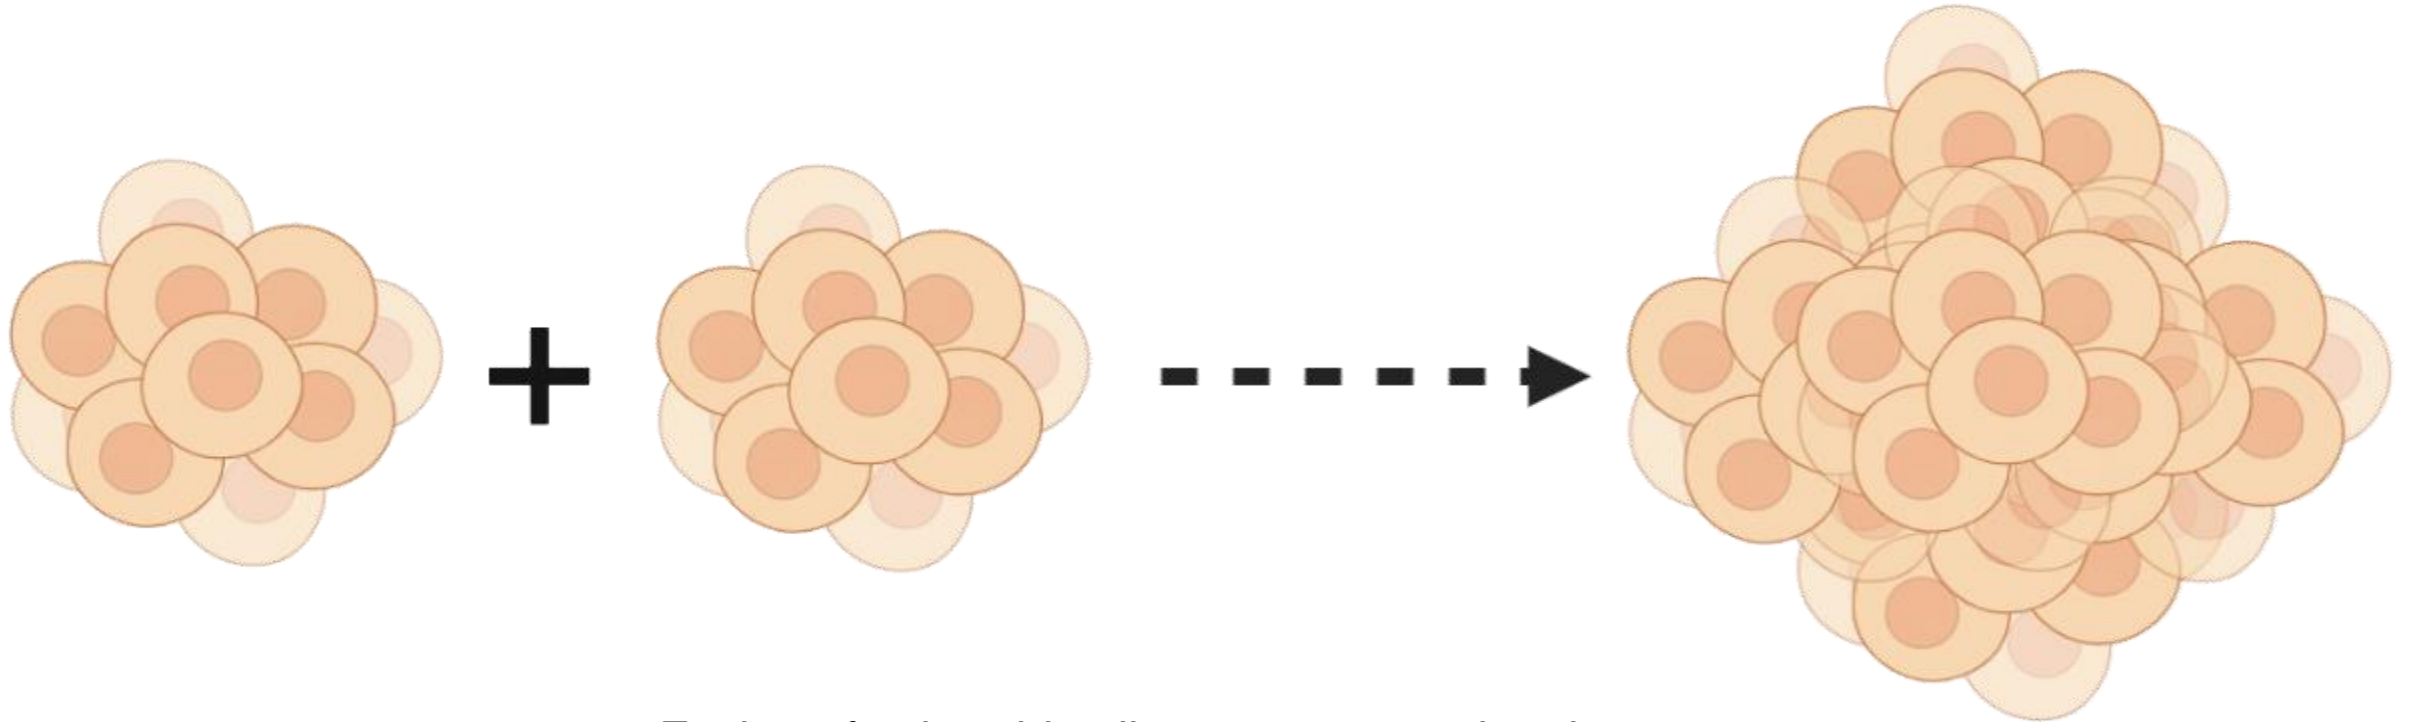

Fusion of spheroids allows to create microtissues

This 3D microenvironment provides a rich microenvironment that better mimics physiological conditions compared with two-dimensional (2D) cell cultures

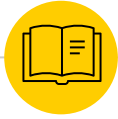

# Normal fusion process

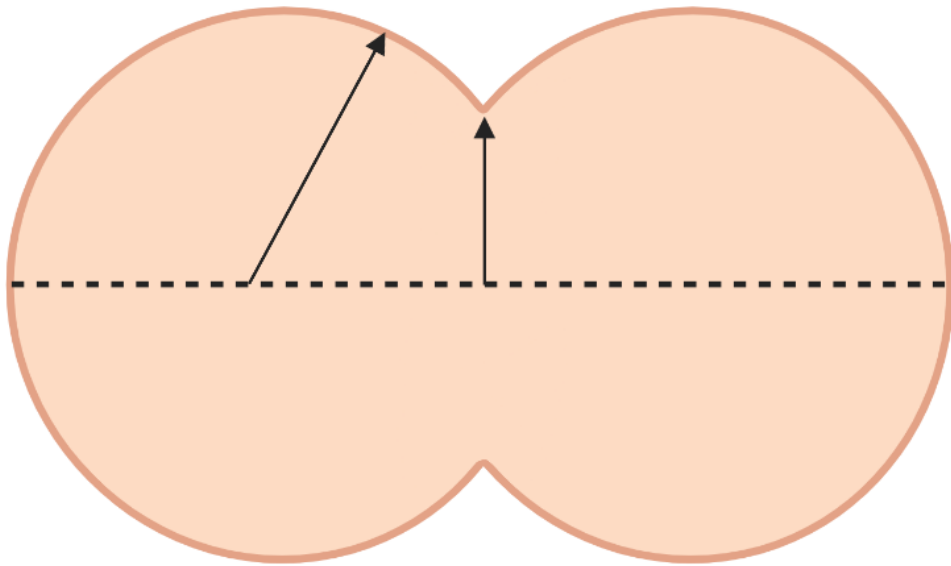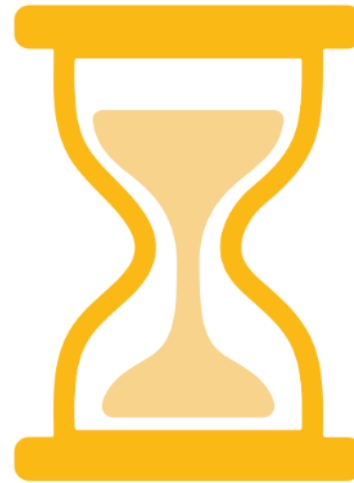

~48 hr

The traditional fusion process takes a long time

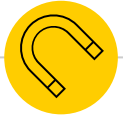

# Proposed model

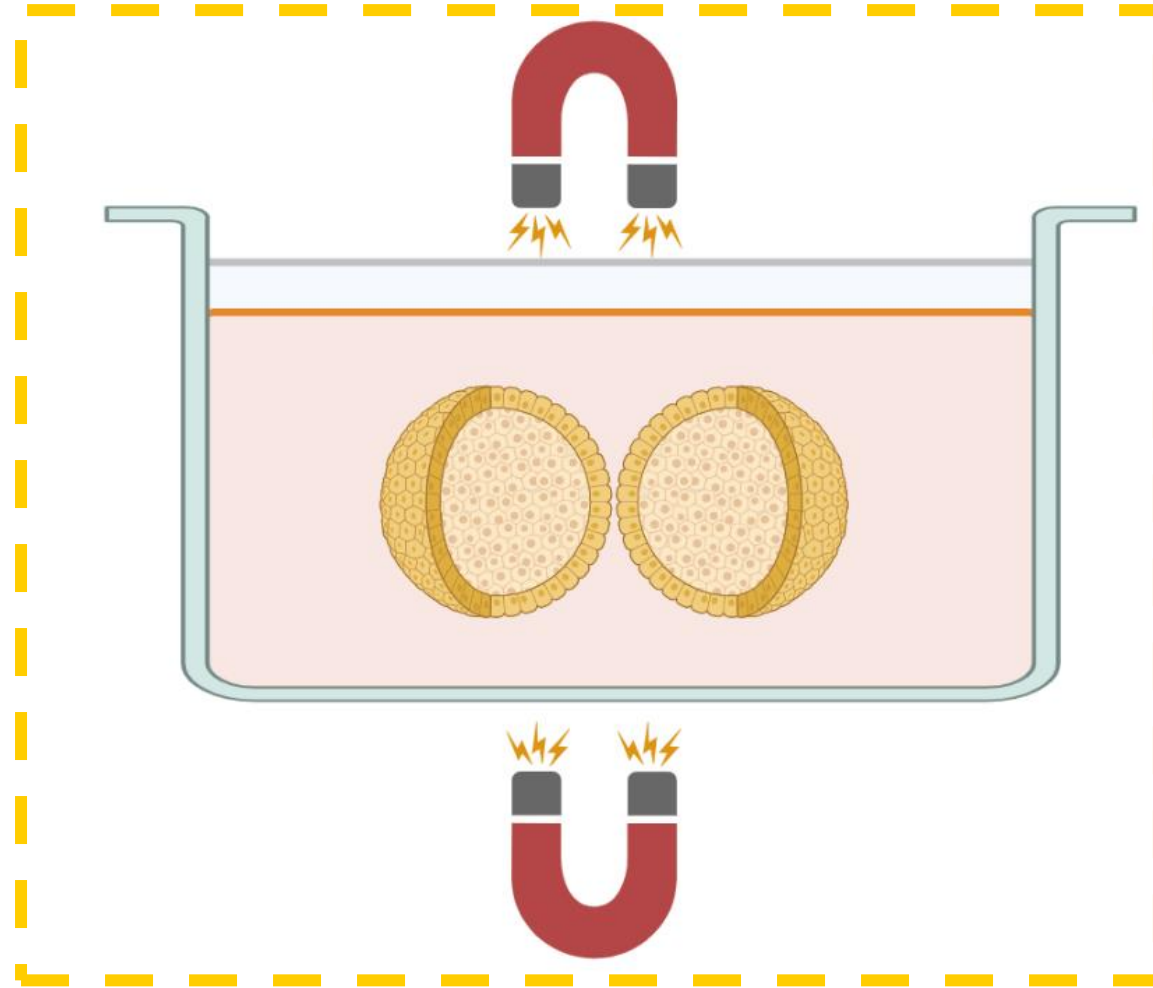

Magnetite ( $\text{Fe}_3\text{O}_4$ ) nanoparticles would generate the magnetic field gradient that is expected to accelerate the fusion process of magnetic spheroids

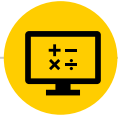

# Mathematical model

## Navier -Stokes

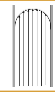

$$\rho \frac{\partial u}{\partial t} + \rho(u \cdot \nabla)u = \nabla \cdot [-pI + \mu(\nabla u + \nabla u^T)] + F$$

$u$  = fluid velocity

$p$  = fluid pressure

$\rho$  = fluid density

$I$  = Identity matrix

$F$  = External forces

## Gauss' Law

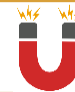

$$\nabla B = 0$$

$$B = \mu_0(H + M)$$

$$-\nabla \cdot (\mu_0 \nabla V_m - \mu_0 M) = 0$$

$H$  = Magnetic field intensity

$B$  = Magnetic flux density

$M$  = Magnetization vector

$\mu_0$  = permeability

$V_m$  = Magnetic scalar potential

## Phase-field: Interface

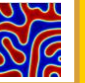

$$\phi(x, t) = \begin{cases} 1, & \text{Spheroids} \\ -1, & \text{Medium} \end{cases}$$

$$\frac{\partial \phi}{\partial t} + u \cdot \nabla \phi = 0$$

$$\begin{aligned} u &= u_n n + u_e \\ u_n &= a - bk \end{aligned}$$

$$k = \frac{1}{|\nabla \phi|} \left( \nabla^2 \phi + \phi \frac{(1 - \phi^2)}{w} \right)$$

$$\frac{\partial \phi}{\partial t} + a - b \frac{1}{|\nabla \phi|} \left( \nabla^2 \phi + \phi \frac{(1 - \phi^2)}{w} \right) n + u_e \cdot \nabla \phi = 0$$

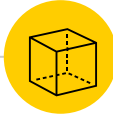

# Geometry

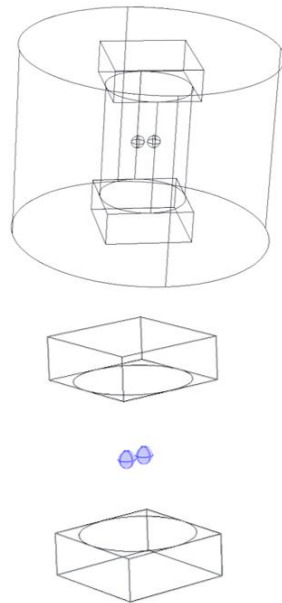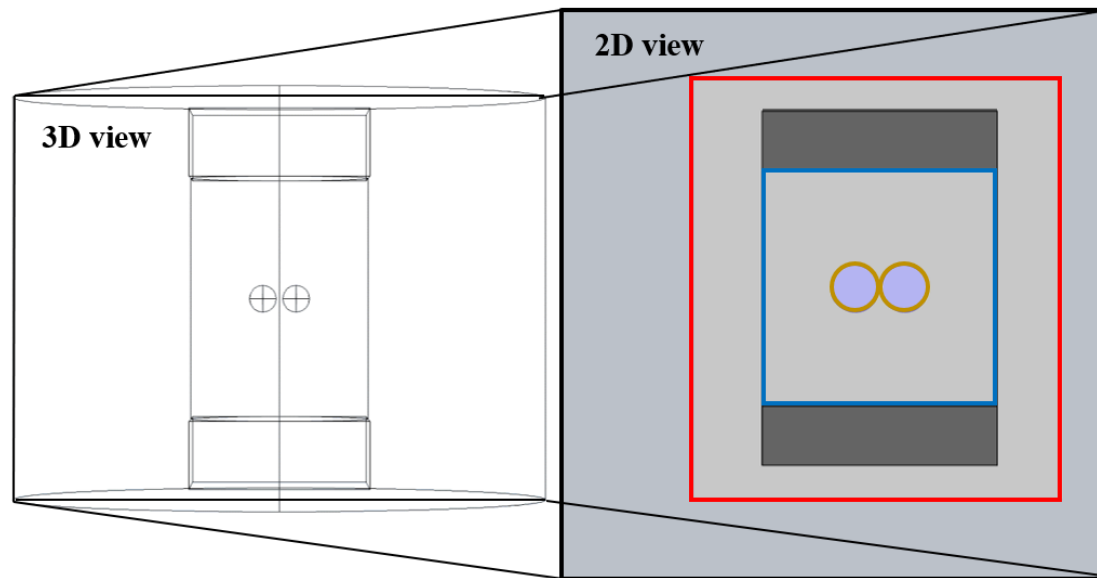

- No Flow
- Initial Interface
- Zero Magnetic scalar potential

**a)** 3D view Geometry spheroids, magnets, and environment configuration, and **b)** 2D Geometry spheroids, magnets, and environment as projected from the 3D geometry.

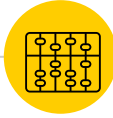

## Evaluation of the models

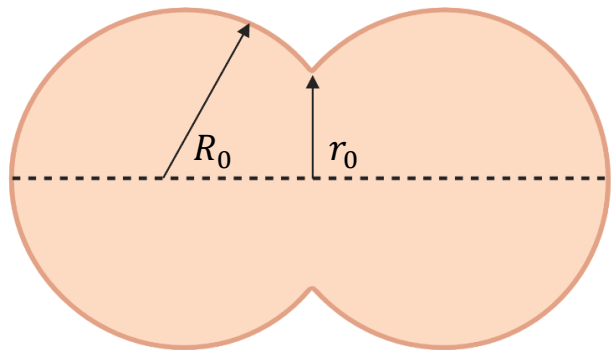

$\left(\frac{r_0}{R_0}\right)^2$  Fusion neck

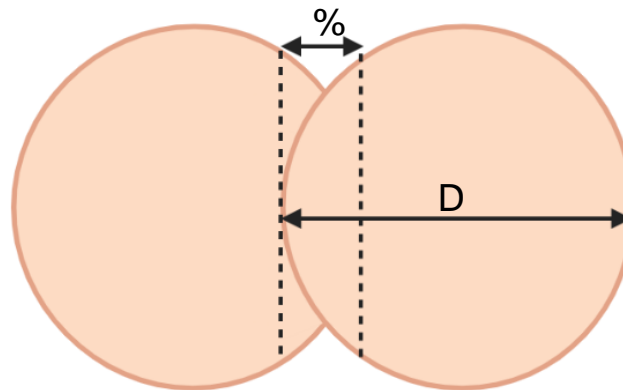

Percent of envelopment

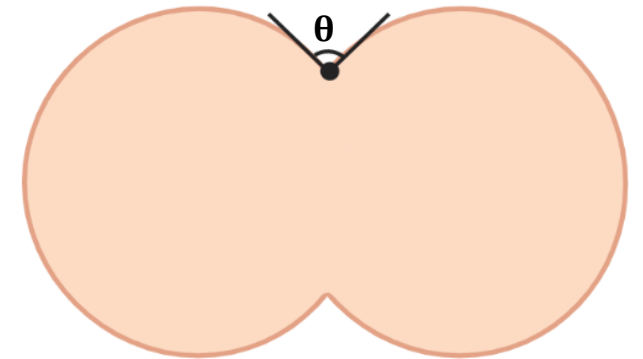

Fusion angle



# ***RESULTS AND DISCUSSION***

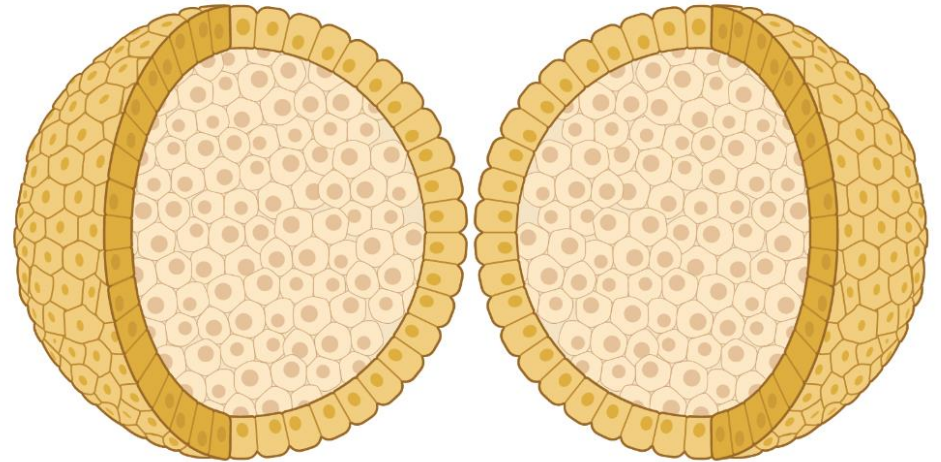

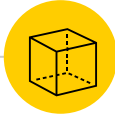

## Mesh convergence 2D base model without magnetic field

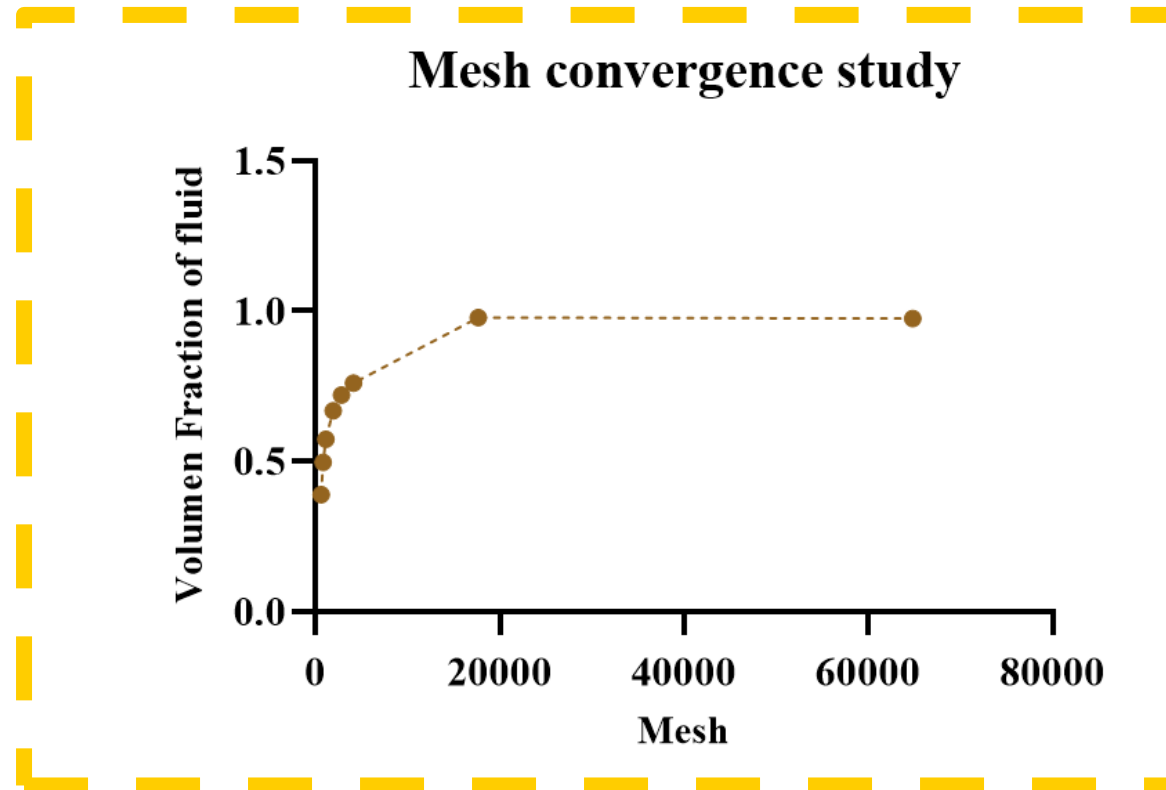

Mesh convergence with 17664 domain elements

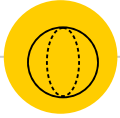

## 2D Fusion model

t=0d Volume fraction

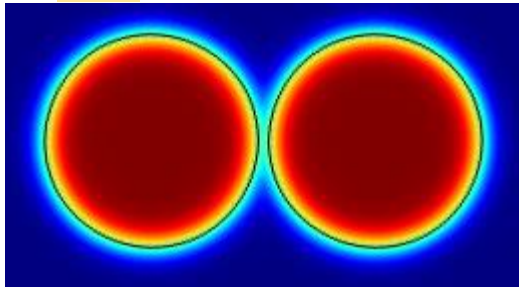

t=2d Volume fraction

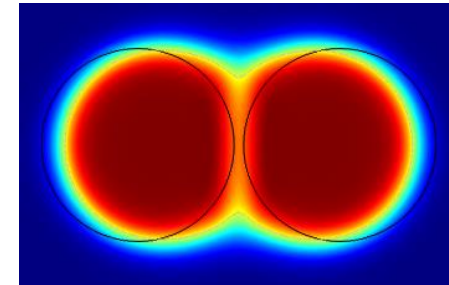

t=4d Volume fraction

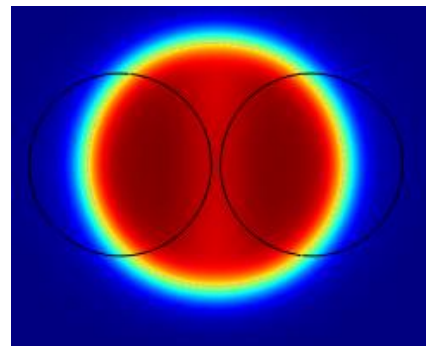



# Evaluation of the 2D model without magnetic field

$\left(\frac{r_0}{R_0}\right)^2$  Fusion neck

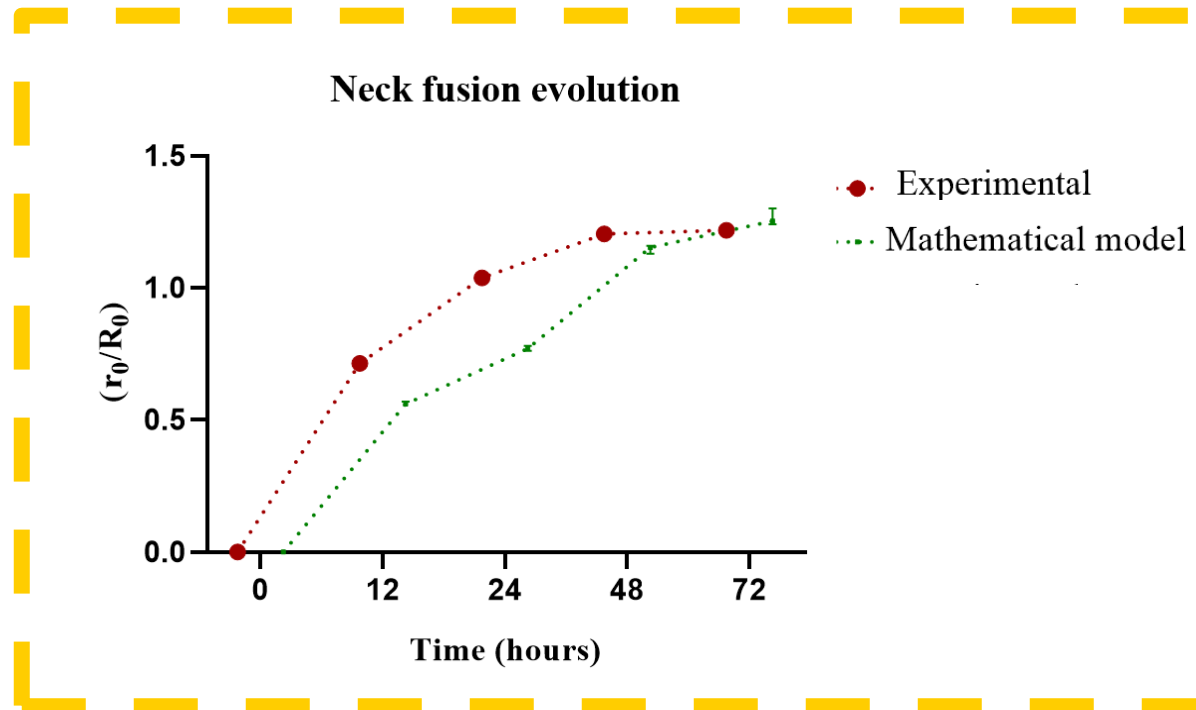

$$\sum_{i=1}^n \frac{|Experimental - Mathematical|}{Experimental}$$

13,981%

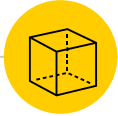

# Evaluation of the 2D model without magnetic field

## Percent of envelopment

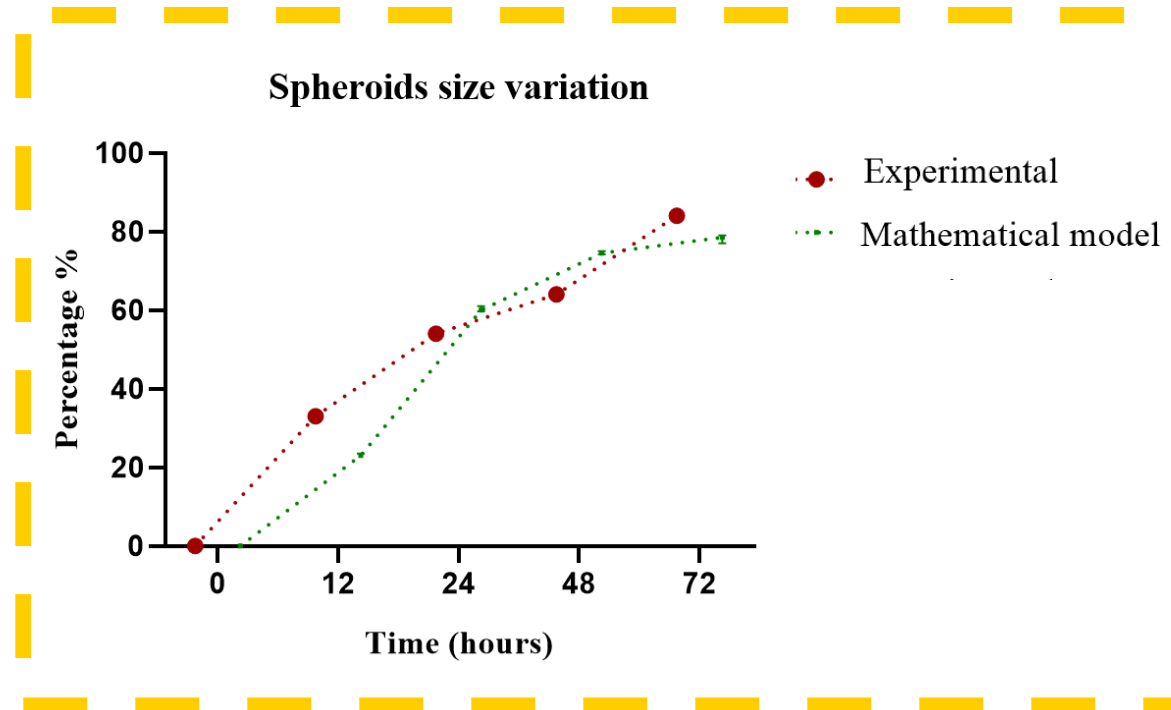

$$\sum_{i=1}^n \frac{|Experimental - Matemathical|}{Experimental}$$

16,1385%



# Evaluation of the 2D model without magnetic field

## Fusion angle

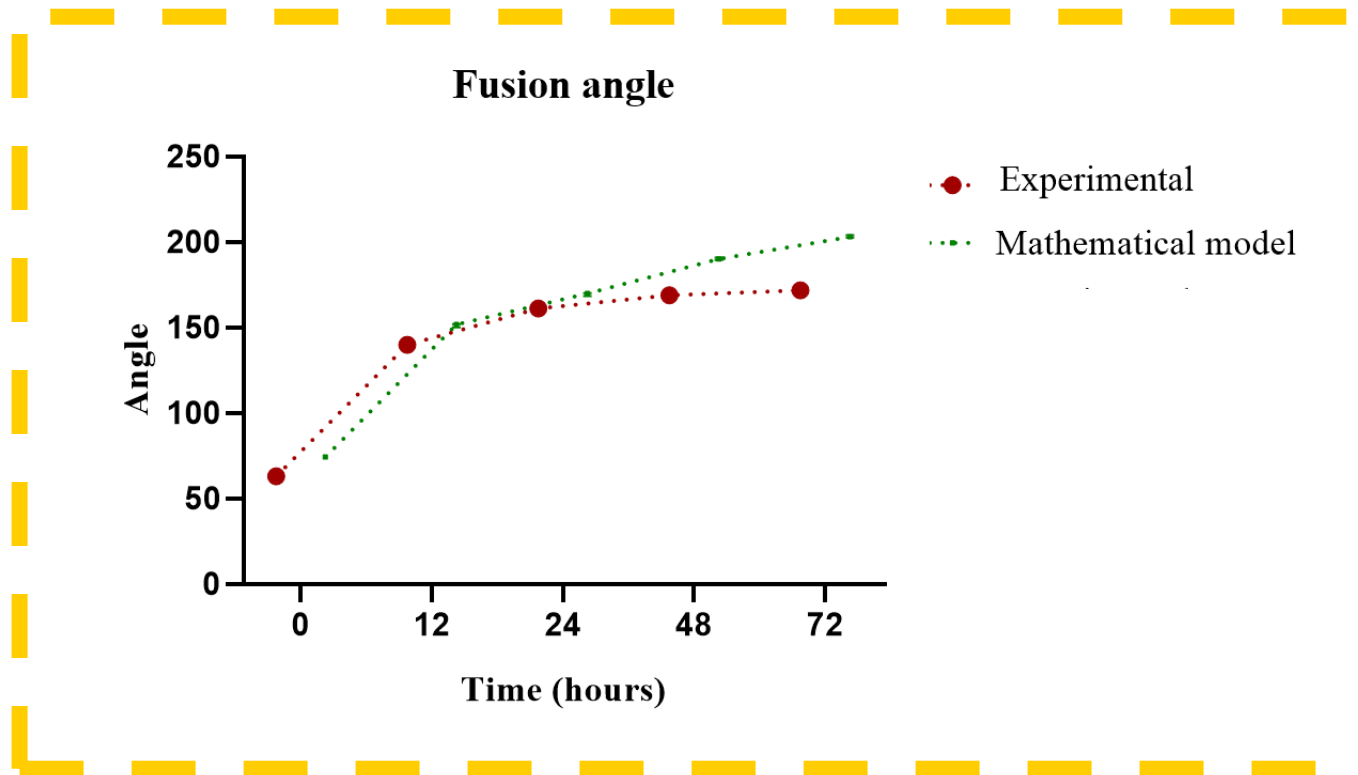

$$\sum_{i=1}^n \frac{|Experimental - Mathematical|}{Experimental}$$

12,4827%



# Model validation with other materials

$\left(\frac{r_0}{R_0}\right)^2$  Fusion neck

### Neck fusion evolution

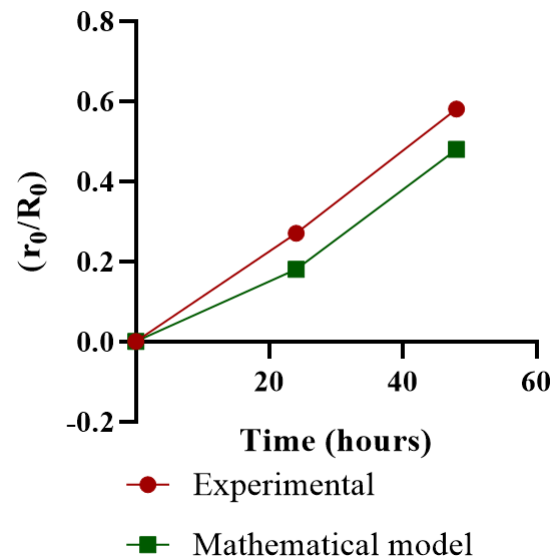

Cardiomyocytes and fibroblasts

### Neck fusion evolution

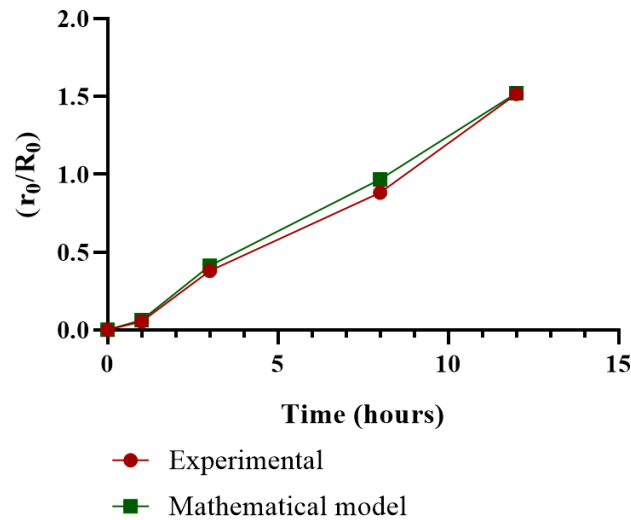

Vascular smooth muscle cells and endothelial cells lining

### Neck fusion evolution

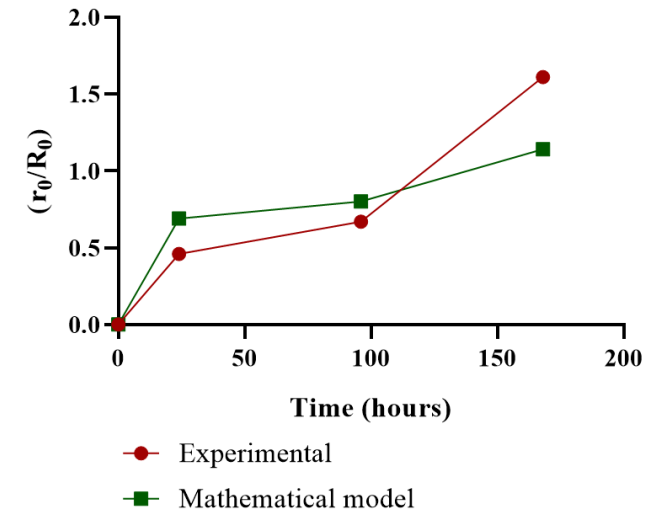

Normal human fibroblast



# Model validation with other materials

Percent of envelopment

Spheroids size variation

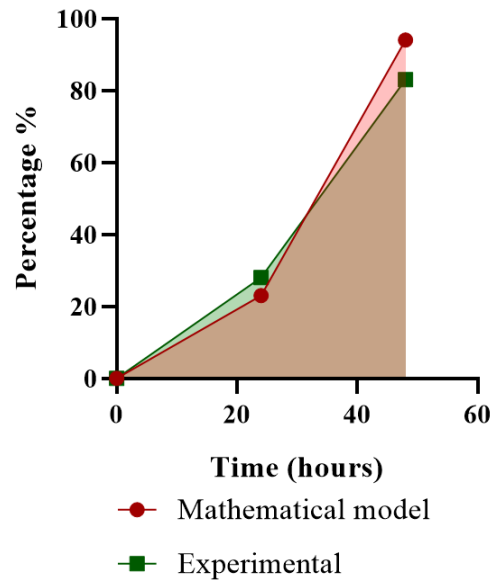

Cardiomyocytes and fibroblasts

Spheroids size variation

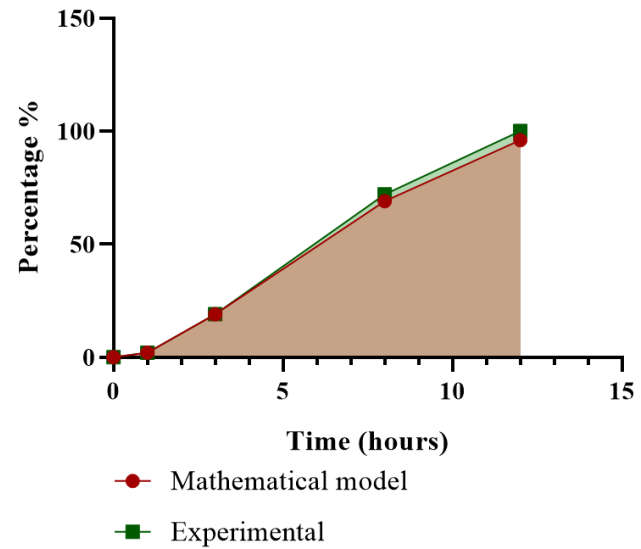

Vascular smooth muscle cells and endothelial cells lining

Spheroids size variation

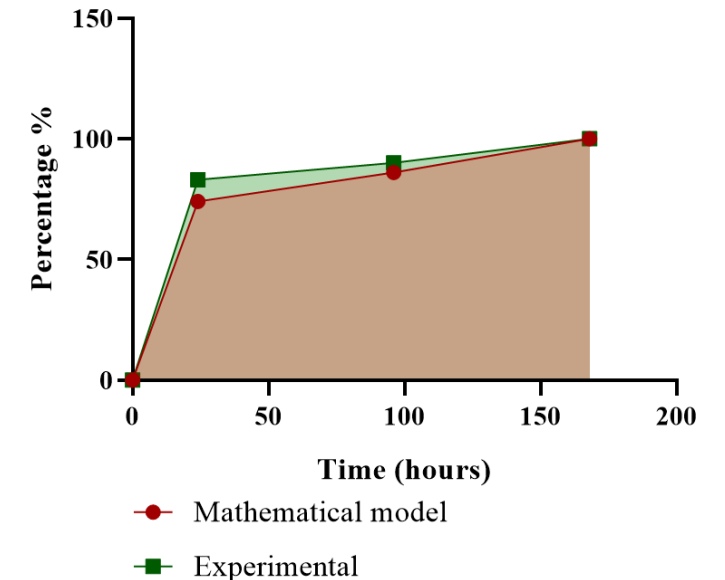

Normal human fibroblast



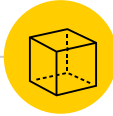

# Model validation with other materials

## Fusion angle

Fusion angle

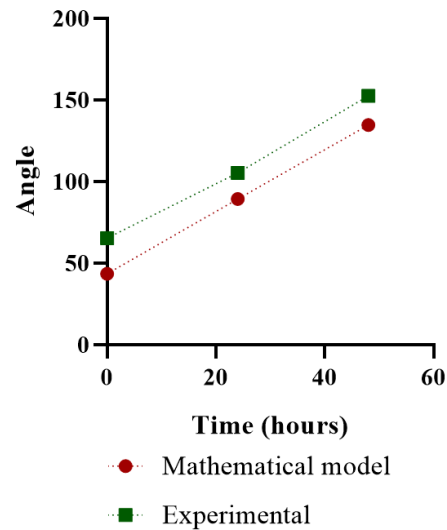

Cardiomyocytes and fibroblasts

Fusion angle

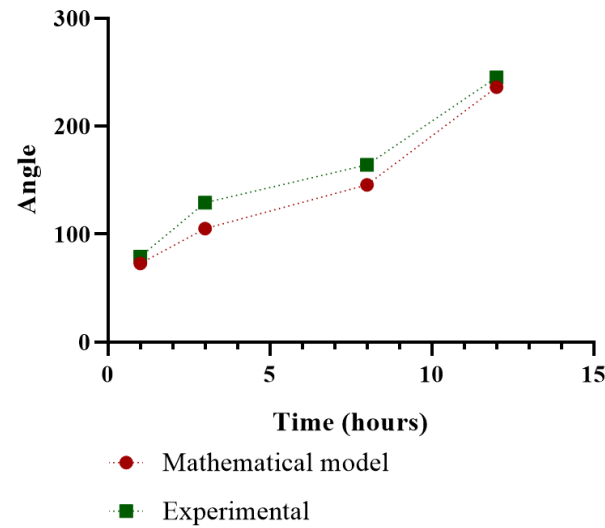

Vascular smooth muscle cells and endothelial cells lining

Fusion angle

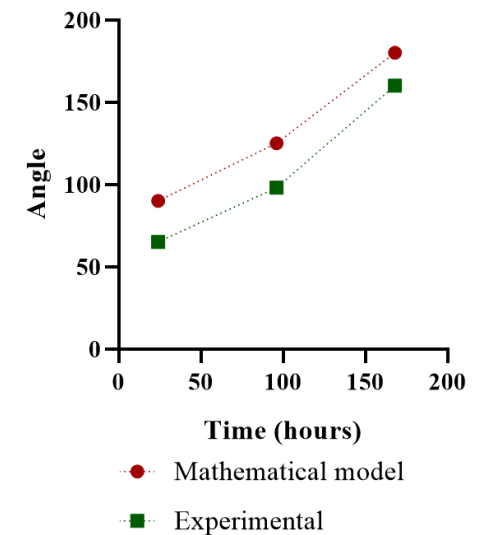

Normal human fibroblast



## Mesh convergence 2D base model with magnetic field

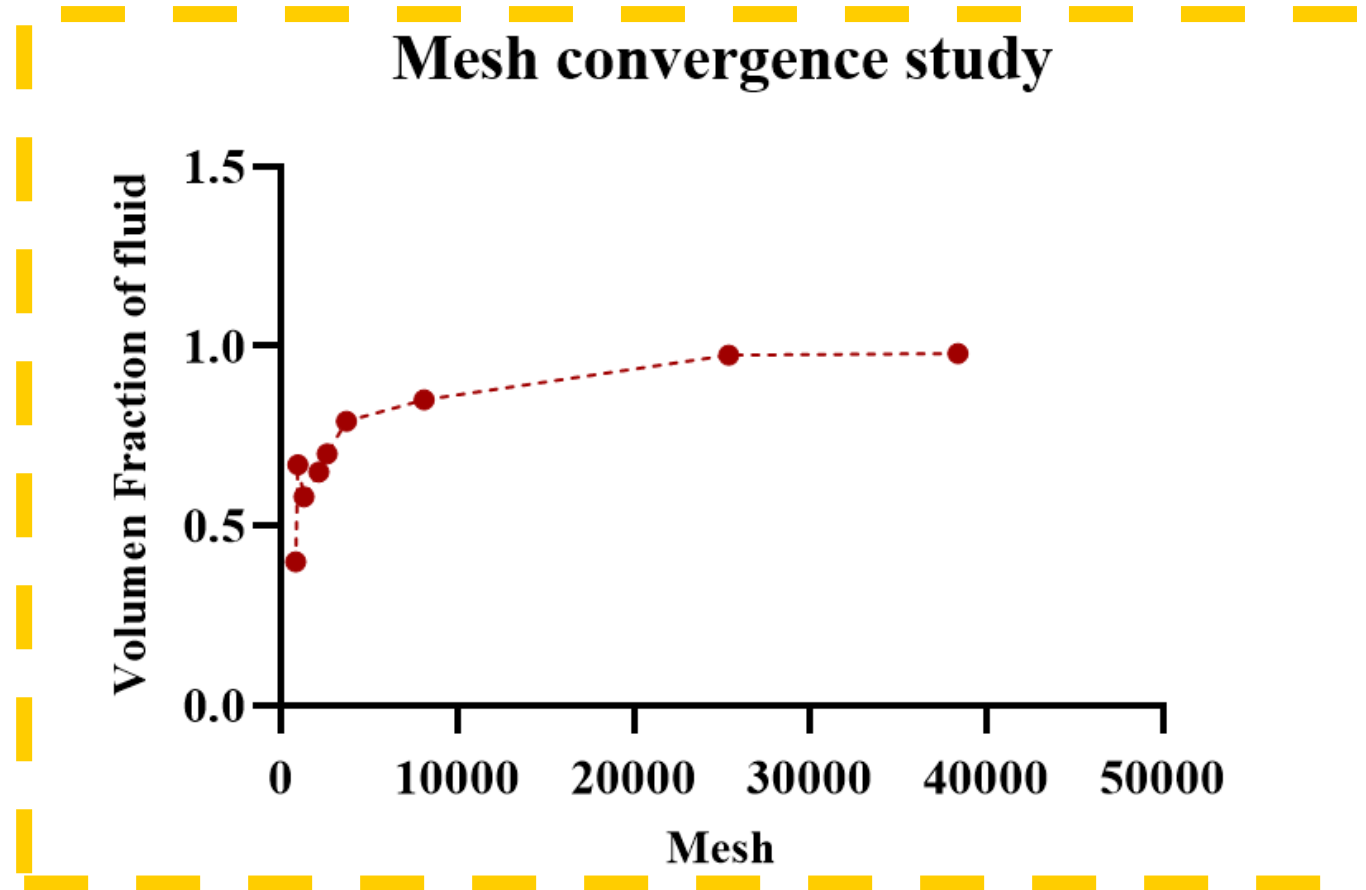

Mesh convergence with 17664 domain elements



## Magnetic flux density norm

### Magnetic flux density

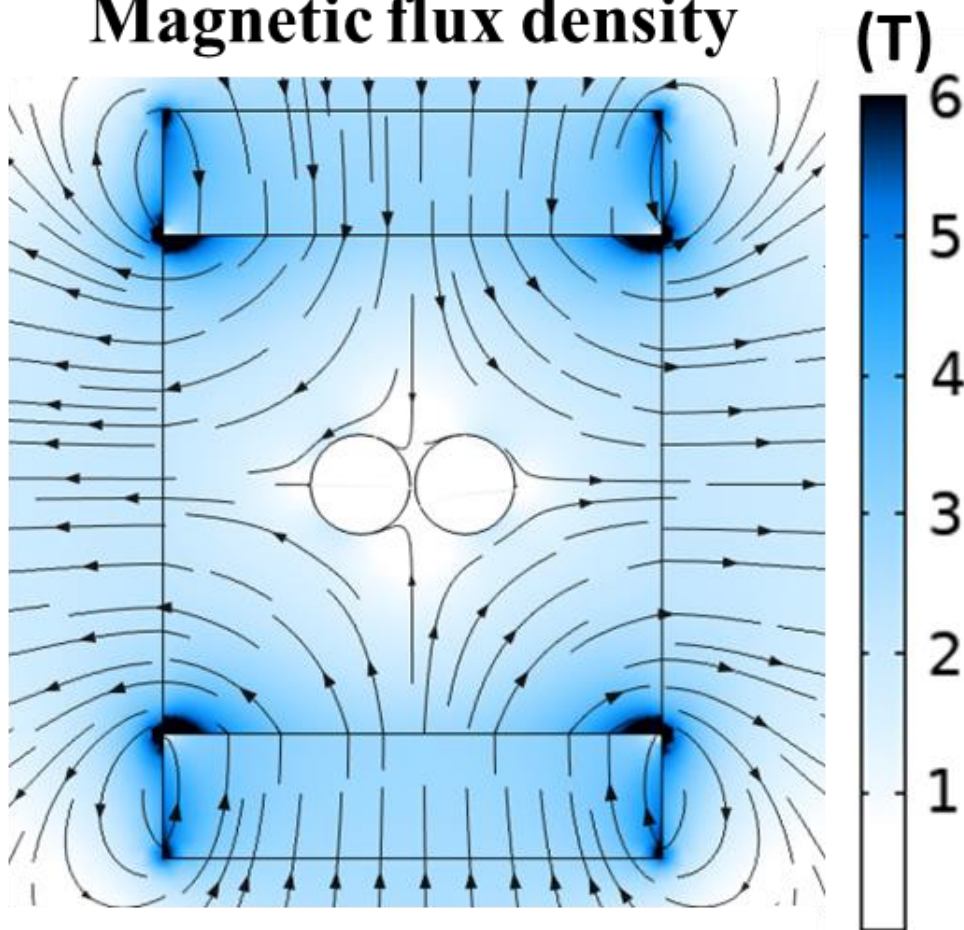

The Magnetic Flux Density Norm is lower in the center, so the spheroids will be pushed to the center by an **inverse force** generated by the magnetic medium.

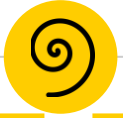

# Magnetic flux density norm

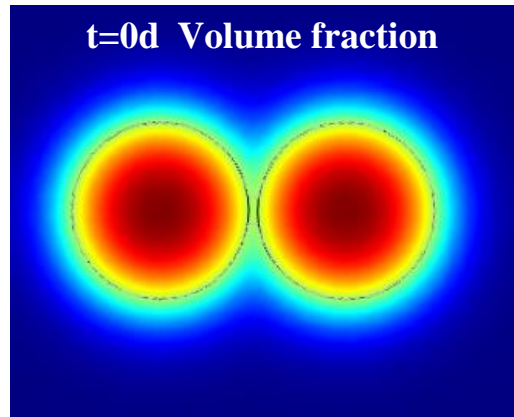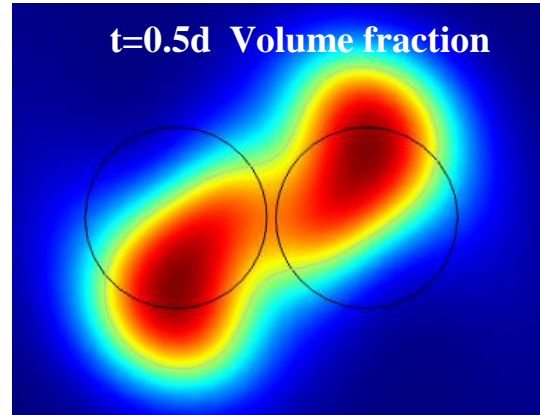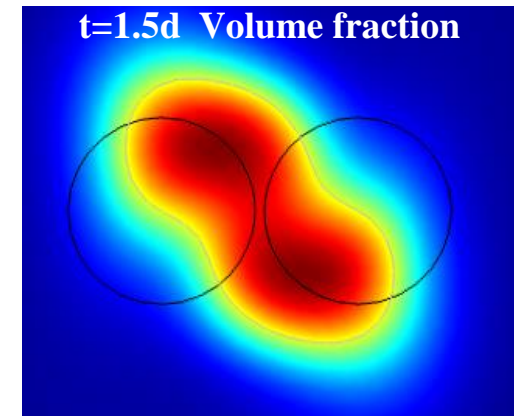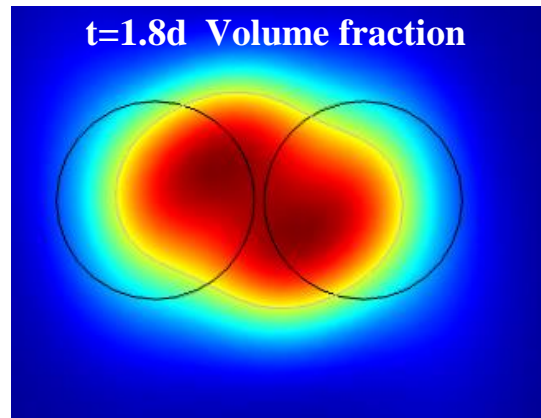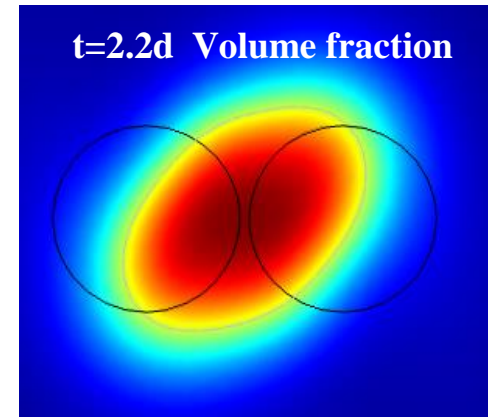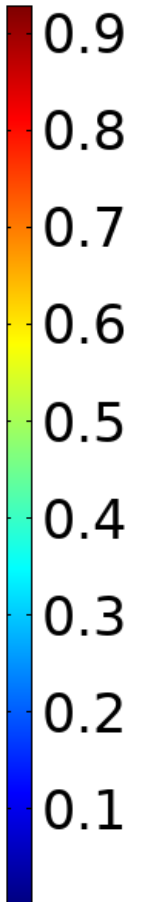

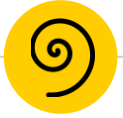

## 2D Model with magnetic field

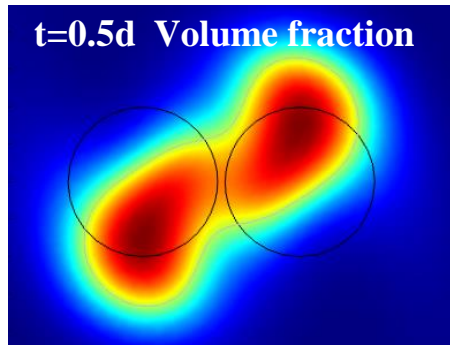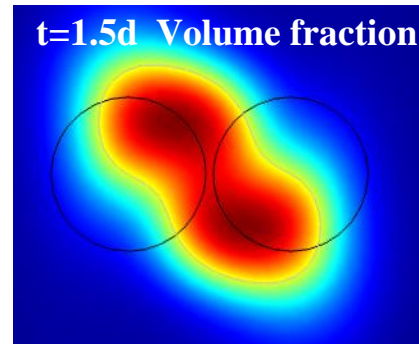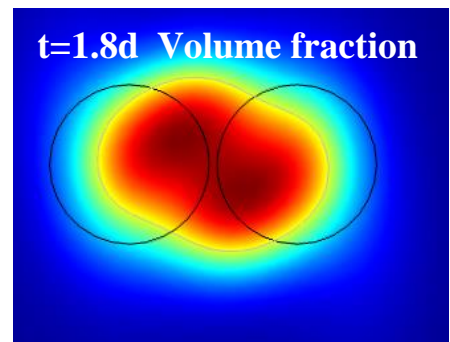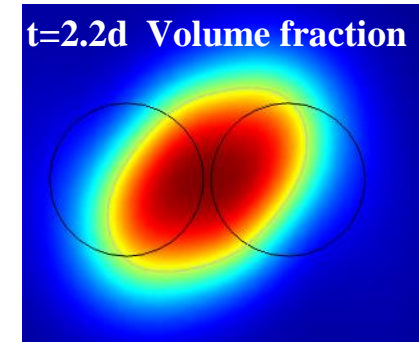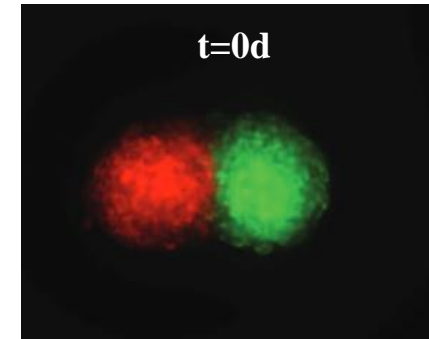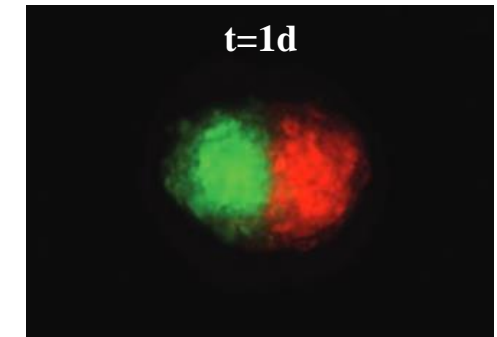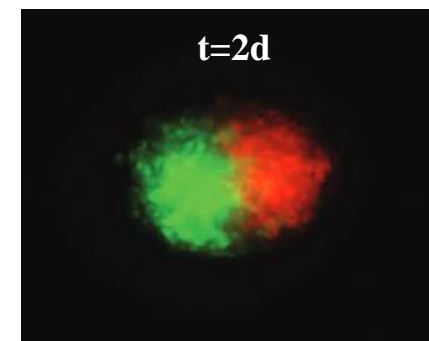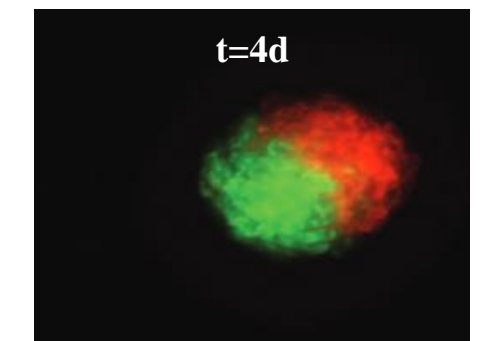



# 2D Model with magnetic field

Neck fusion evolution

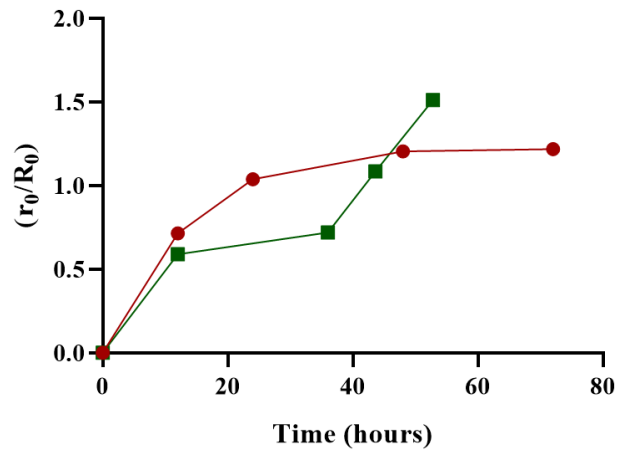

● Experimental  
■ Mathematical model

Percent of envelopment

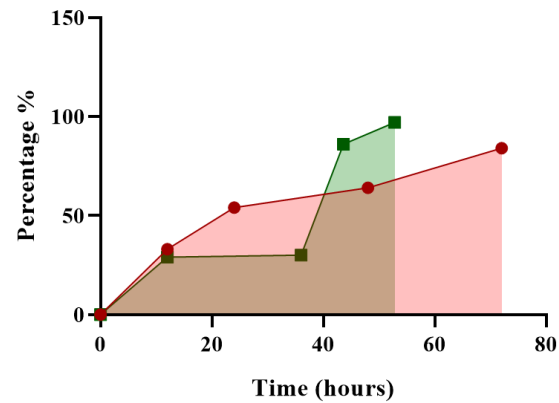

● Experimental  
■ Mathematical model

Fusion angle

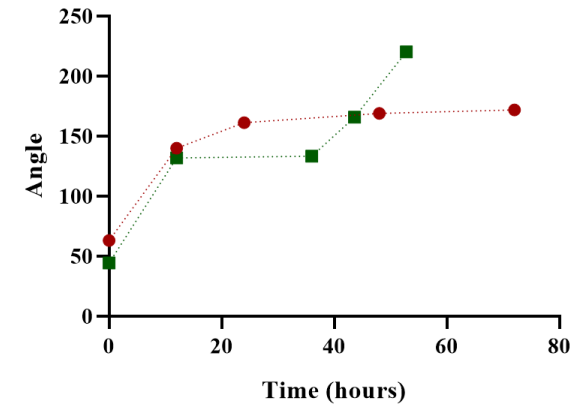

● Experimental  
■ Mathematical model

The Fusion accelerates in the **second half** of the process

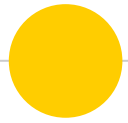

## Complex 2D structures

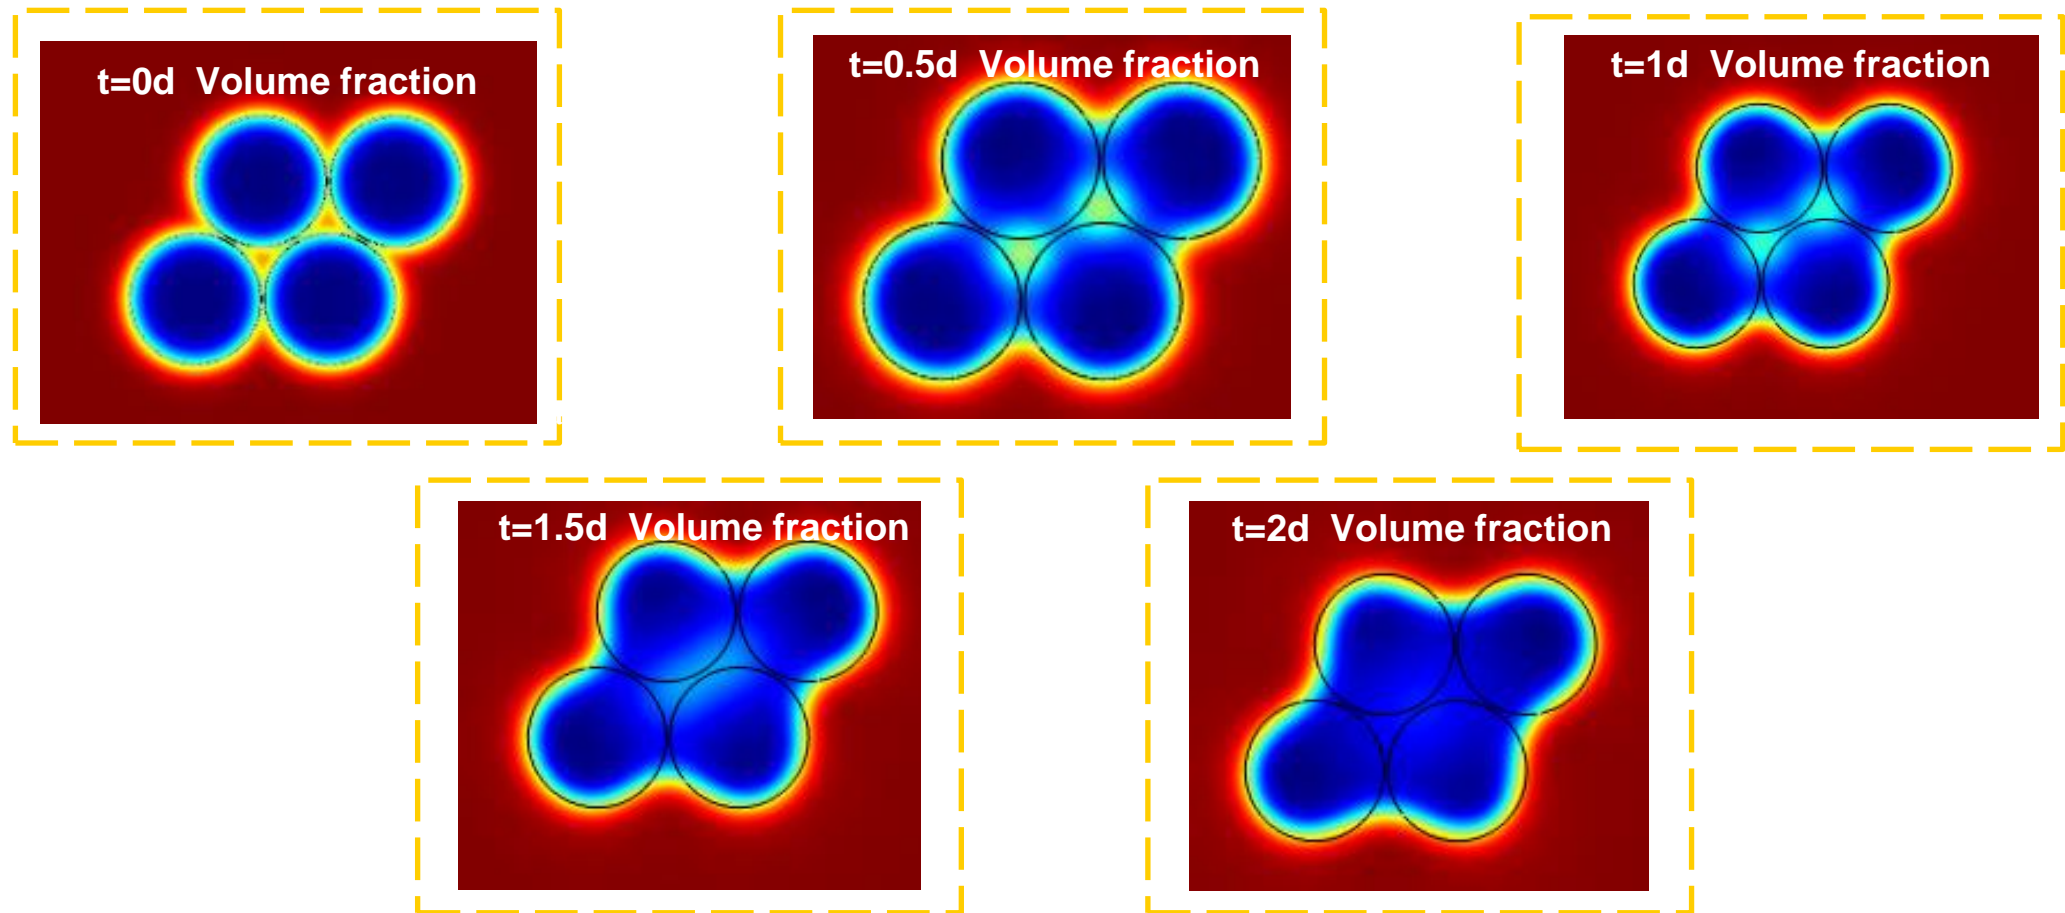



# Complex 2D structures

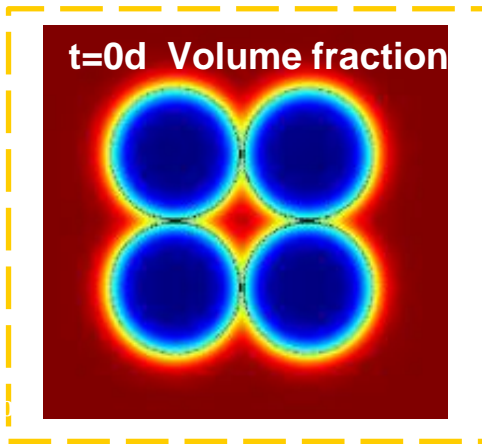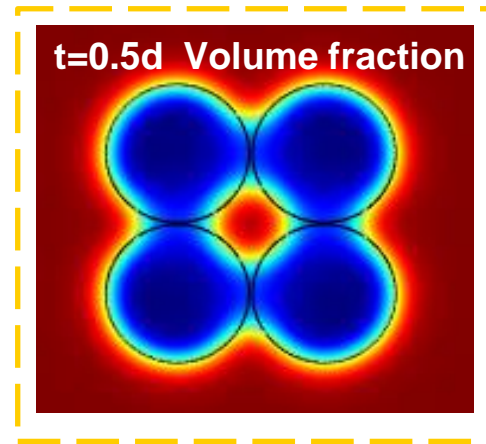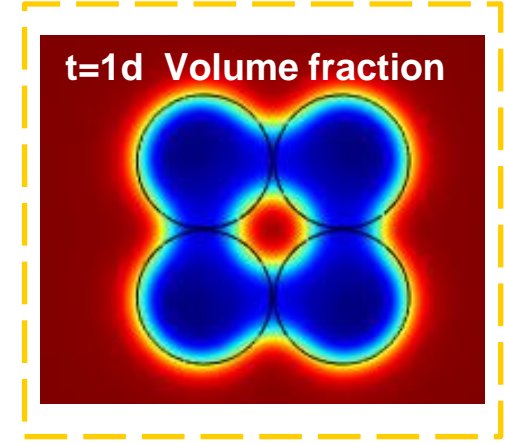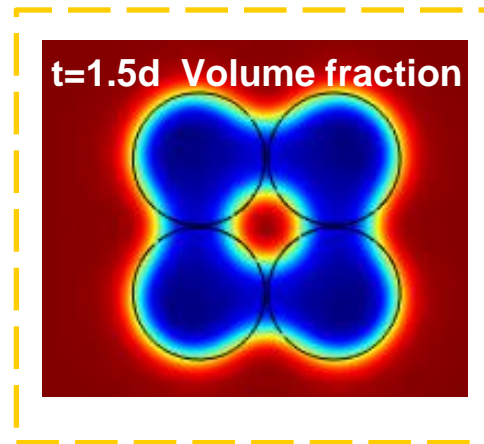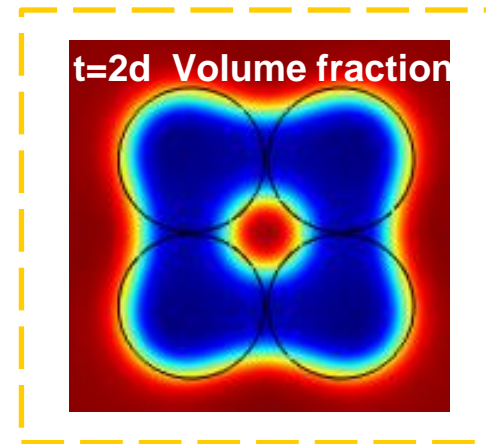





## Complex 2D structures

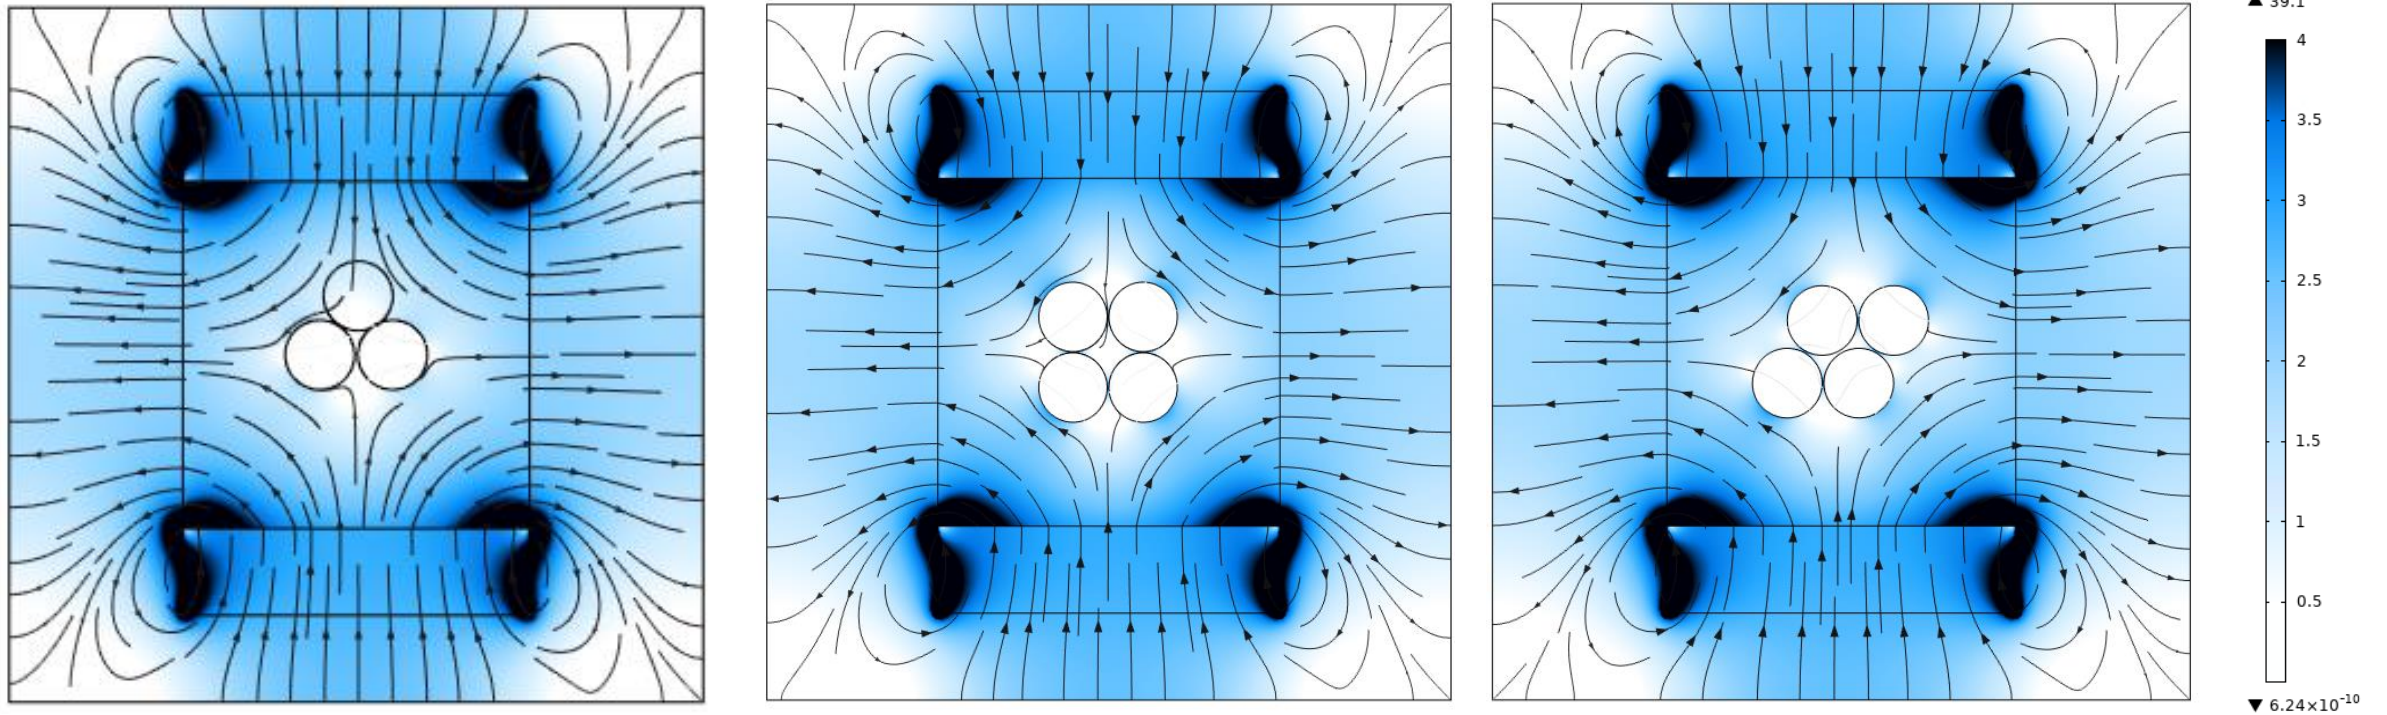

The Magnetic Flux Density Norm is lower in the center, so the spheroids will be pushed to the center by an **inverse force** generated by the magnetic medium.

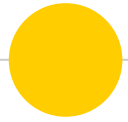

## Conclusions

- ⦿ **Magnetized spheroid fusion** reached a max. force of 6T for the magnetic field, which induced cell-cell interactions.
- ⦿ **Fusion process was improved approximately 45-50%** due to the magnetic field gradient.
- ⦿ The fusion process described:
  - a **similar increase in spheroid size**
  - presence of a bonding bridge after the first contact
  - a slow and constant fusion
  - The formation of a single oval spheroid.

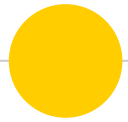

# Future work

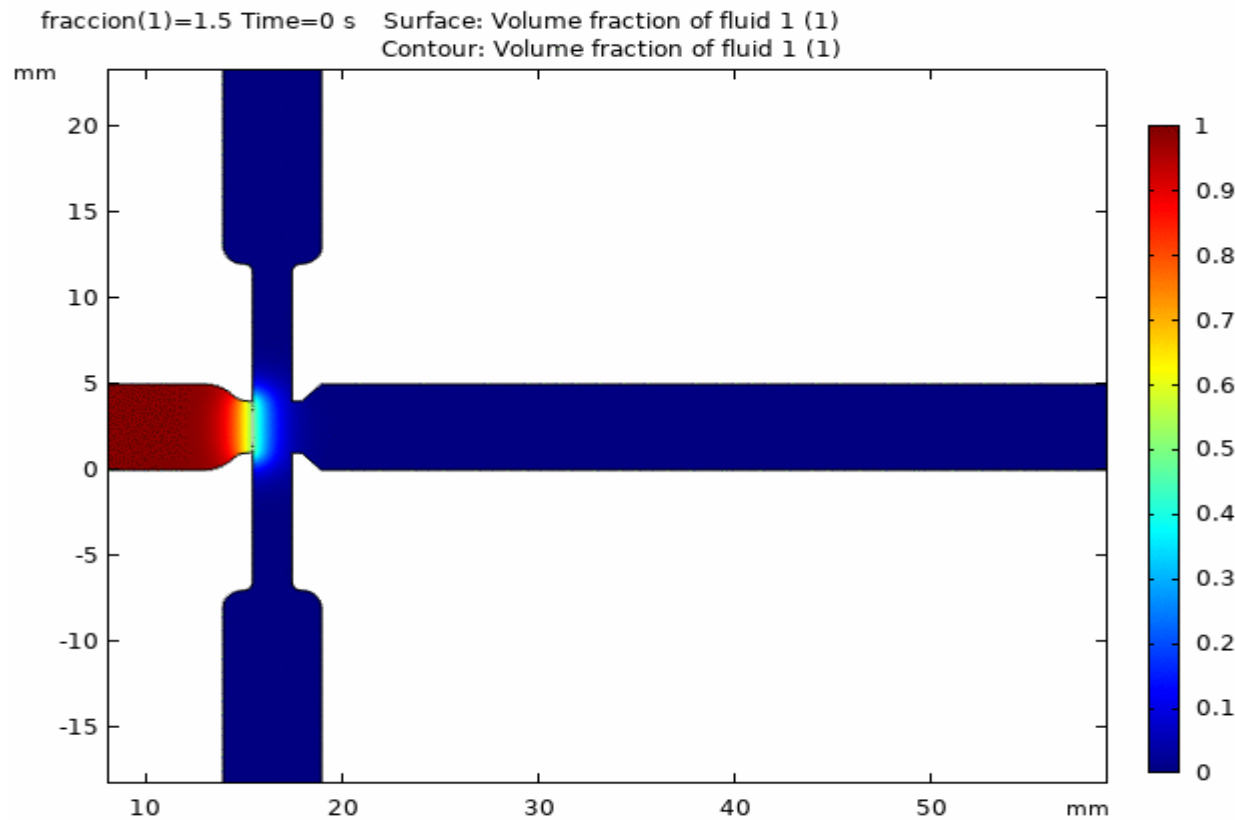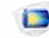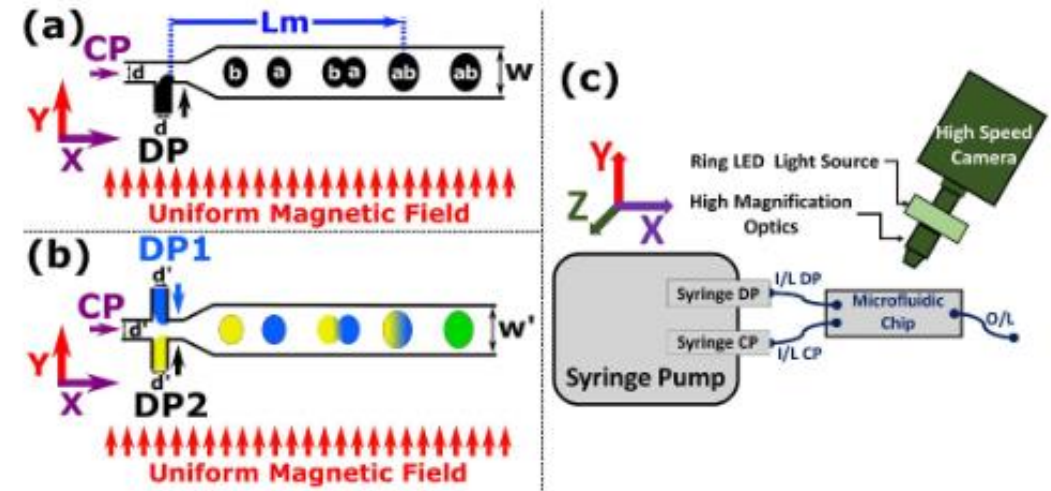

Droplet merging on a lab-on-a-chip platform by uniform magnetic fields. DOI: 10.1038/srep37671

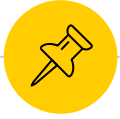

# Research group

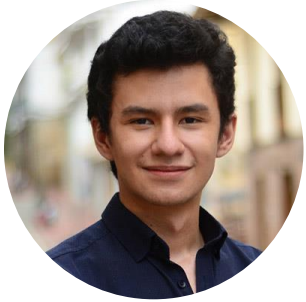

**Cristian F. Rodríguez**  
MSc student  
cf.rodriguez@uniandes.edu.co

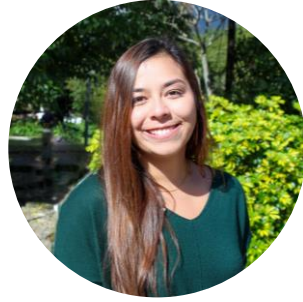

**María Alejandra CastillaB**  
PhD, student  
ma.castilla964@uniandes.edu.co

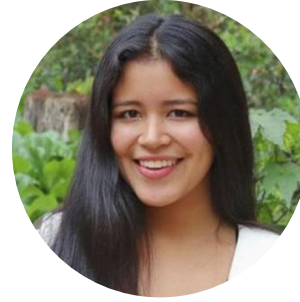

**Laura Ortiz Calderon**  
BSc student  
l.ortizc@uniandes.edu.co

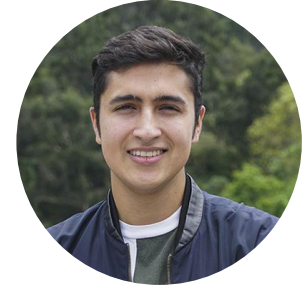

**Kevin Giraldo**  
BS Biomedical engineer.  
ka.giraldo@uniandes.edu.co

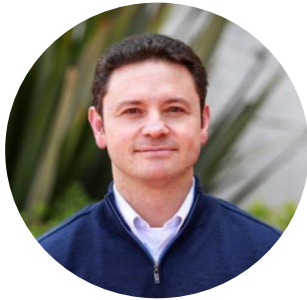

**Juan C. Cruz. PhD**  
Associate professor  
jc.cruz@uniandes.edu.co

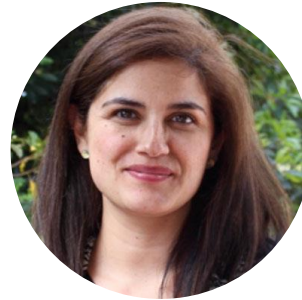

**Carolina Muñoz. PhD**  
Associate professor  
c.munoz2016@uniandes.edu.co

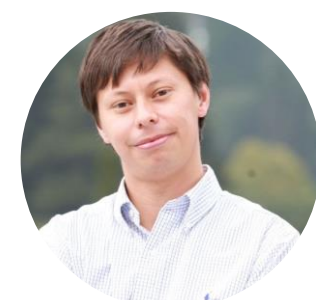

**Johann Osma, PhD**  
Associate professor  
jf.osma43@uniandes.edu.co
